# Supplementary material
Source: MDPI journal article supplement (https://www.mdpi.com/2073-4441/14/15/2411)
Supplement: s1 [file s1]

Table S1: Banquette samples composition expressed both in weight and in percentage

| Sample name | Initial weight (Kg) | Rizhome weight (10 <sup>-3</sup> Kg) | Sediment weight (Kg) | Leaves+Fibers weight (Kg) | % Rhizomes | % Sediment | % Leaves+Fibers |
|-------------|---------------------|--------------------------------------|----------------------|---------------------------|------------|------------|-----------------|
| July_1      | 1.05                | 4.9                                  | 0.609                | 0.434                     | 0.46%      | 58.1%      | 41.4%           |
| July_2      | 0.95                | 3.2                                  | 0.572                | 0.373                     | 0.34%      | 60.3%      | 39.4%           |
| July_3      | 1.22                | 3.6                                  | 0.758                | 0.462                     | 0.30%      | 61.9%      | 37.8%           |
| July_4      | 1.37                | 0.0                                  | 0.923                | 0.451                     | 0.00%      | 67.2%      | 32.8%           |
| July_5      | 1.61                | 16.5                                 | 0.979                | 0.611                     | 1.02%      | 61.0%      | 38.0%           |
| July_6      | 1.88                | 10.8                                 | 1.103                | 0.765                     | 0.58%      | 58.7%      | 40.7%           |
| July_7      | 1.31                | 1.7                                  | 0.872                | 0.441                     | 0.13%      | 66.3%      | 33.5%           |
| July_8      | 1.20                | 1.6                                  | 0.877                | 0.318                     | 0.13%      | 73.3%      | 26.6%           |
| July_9      | 1.28                | 0.0                                  | 0.886                | 0.395                     | 0.00%      | 69.1%      | 30.9%           |
| July_10     | 1.25                | 0.0                                  | 0.864                | 0.388                     | 0.00%      | 69.0%      | 31.0%           |
| October_1   | 1.93                | 8.1                                  | 1.556                | 0.365                     | 0.42%      | 80.7%      | 18.9%           |
| October_2   | 1.30                | 5.8                                  | 0.892                | 0.398                     | 0.45%      | 68.8%      | 30.7%           |
| October_3   | 1.41                | 8.2                                  | 1.070                | 0.327                     | 0.58%      | 76.2%      | 23.3%           |
| October_4   | 2.44                | 6.6                                  | 2.120                | 0.314                     | 0.27%      | 86.9%      | 12.9%           |
| October_5   | 1.22                | 22.2                                 | 0.824                | 0.377                     | 1.82%      | 67.3%      | 30.8%           |
| October_6   | 1.58                | 6.4                                  | 1.265                | 0.313                     | 0.40%      | 79.8%      | 19.8%           |
| October_7   | 0.61                | 13.6                                 | 0.135                | 0.457                     | 2.25%      | 22.3%      | 75.4%           |
| October_8   | 1.37                | 33.1                                 | 0.941                | 0.394                     | 2.42%      | 68.8%      | 28.8%           |
| October_9   | 0.89                | 33.8                                 | 0.744                | 0.109                     | 3.81%      | 83.9%      | 12.2%           |
| October_10  | 1.11                | 5.5                                  | 0.729                | 0.378                     | 0.49%      | 65.5%      | 34.0%           |
| October_11  | 0.85                | 3.4                                  | 0.574                | 0.277                     | 0.39%      | 67.2%      | 32.4%           |
| October_12  | 2.83                | 13.3                                 | 2.544                | 0.268                     | 0.47%      | 90.0%      | 9.5%            |
| October_13  | 2.97                | 0.0                                  | 2.718                | 0.251                     | 0.00%      | 91.6%      | 8.4%            |
| October_14  | 0.44                | 24.9                                 | 0.072                | 0.342                     | 5.68%      | 16.4%      | 77.9%           |
| October_15  | 0.64                | 63.0                                 | 0.157                | 0.419                     | 9.86%      | 24.6%      | 65.6%           |
| October_16  | 0.85                | 58.6                                 | 0.343                | 0.447                     | 6.91%      | 40.4%      | 52.7%           |
| February_1  | 0.73                | 5.5                                  | 0.301                | 0.424                     | 0.75%      | 41.2%      | 58.1%           |
| February_2  | 0.66                | 7.7                                  | 0.238                | 0.410                     | 1.18%      | 36.3%      | 62.5%           |
| February_3  | 0.89                | 11.1                                 | 0.003                | 0.880                     | 1.24%      | 0.4%       | 98.4%           |
| February_4  | 1.02                | 9.3                                  | 0.487                | 0.519                     | 0.92%      | 48.0%      | 51.1%           |
| February_5  | 0.77                | 5.3                                  | 0.294                | 0.473                     | 0.68%      | 38.1%      | 61.2%           |
| February_6  | 0.45                | 6.6                                  | 0.019                | 0.429                     | 1.46%      | 4.2%       | 94.3%           |
| February_7  | 0.60                | 15.9                                 | 0.002                | 0.584                     | 2.63%      | 0.3%       | 97.0%           |
| February_8  | 0.68                | 88.5                                 | 0.002                | 0.593                     | 12.96%     | 0.3%       | 86.8%           |
| February_9  | 1.49                | 15.2                                 | 0.897                | 0.578                     | 1.02%      | 60.2%      | 38.8%           |
| February_10 | 0.56                | 1.6                                  | 0.005                | 0.558                     | 0.28%      | 0.9%       | 98.9%           |
| February_11 | 0.97                | 6.2                                  | 0.391                | 0.573                     | 0.63%      | 40.3%      | 59.1%           |
| February_12 | 0.55                | 3.1                                  | 0.008                | 0.540                     | 0.57%      | 1.5%       | 97.9%           |
| February_13 | 0.49                | 2.2                                  | 0.007                | 0.477                     | 0.44%      | 1.5%       | 98.0%           |
| February_14 | 0.73                | 0.0                                  | 0.007                | 0.724                     | 0.00%      | 1.0%       | 99.0%           |
| February_15 | 0.40                | 21.0                                 | 0.009                | 0.372                     | 5.20%      | 2.3%       | 92.5%           |

|             |      |      |       |       |       |       |       |
|-------------|------|------|-------|-------|-------|-------|-------|
| February_16 | 0.87 | 22.7 | 0.163 | 0.680 | 2.62% | 18.9% | 78.5% |
| February_17 | 0.58 | 51.5 | 0.000 | 0.526 | 8.92% | 0.0%  | 91.1% |
| February_18 | 1.97 | 2.4  | 1.472 | 0.494 | 0.12% | 74.8% | 25.1% |
| February_19 | 1.68 | 14.8 | 1.188 | 0.479 | 0.88% | 70.7% | 28.5% |
| February_20 | 0.65 | 21.4 | 0.115 | 0.518 | 3.26% | 17.6% | 79.1% |
| April_1     | 1.95 | 3.6  | 1.153 | 0.795 | 0.18% | 59.1% | 40.7% |
| April_2     | 1.21 | 0.0  | 0.162 | 1.052 | 0.00% | 13.3% | 86.7% |
| April_3     | 1.92 | 36.8 | 1.310 | 0.571 | 1.92% | 68.3% | 29.8% |
| April_4     | 1.50 | 39.0 | 1.036 | 0.429 | 2.60% | 68.9% | 28.5% |
| April_5     | 1.54 | 3.9  | 1.021 | 0.510 | 0.25% | 66.5% | 33.2% |
| April_6     | 0.94 | 3.2  | 0.131 | 0.807 | 0.34% | 13.9% | 85.8% |
| April_7     | 0.97 | 4.7  | 0.052 | 0.914 | 0.49% | 5.3%  | 94.2% |
| April_8     | 1.80 | 4.3  | 1.151 | 0.650 | 0.24% | 63.8% | 36.0% |
| April_9     | 1.04 | 3.8  | 0.167 | 0.869 | 0.37% | 16.0% | 83.6% |
| April_10    | 0.84 | 2.8  | 0.223 | 0.615 | 0.34% | 26.5% | 73.2% |
| April_11    | 1.61 | 4.0  | 1.054 | 0.551 | 0.25% | 65.5% | 34.2% |
| April_12    | 0.67 | 9.2  | 0.068 | 0.597 | 1.37% | 10.1% | 88.6% |
| April_13    | 0.72 | 1.4  | 0.127 | 0.592 | 0.20% | 17.7% | 82.1% |
| April_14    | 0.83 | 11.0 | 0.120 | 0.703 | 1.32% | 14.3% | 84.3% |
| April_15    | 0.81 | 4.3  | 0.096 | 0.705 | 0.54% | 12.0% | 87.5% |
| April_16    | 0.94 | 2.1  | 0.069 | 0.866 | 0.23% | 7.4%  | 92.4% |
